# Supplementary material
Source: publisher figshare collection journal article supplement (https://frontiersin.figshare.com/ndownloader/files/21913278)
Supplement: Supplementary file [file 21913278]

## *Supplementary Material*

**Table S1.** Number and gender of animals used in each experimental protocol.

| Experimental protocol                                                   | WT    |         | TAAR5-KO |         |
|-------------------------------------------------------------------------|-------|---------|----------|---------|
|                                                                         | Males | Females | Males    | Females |
| LacZ histochemistry                                                     | 5     | 6       | 8        | 6       |
| Locomotor activity in actometer apparatus                               | 6     | 5       | 5        | 6       |
| Circular Open Field Test                                                | 9     | -       | 9        | -       |
| Light-Dark Transition Test                                              | 9     | -       | 6        | -       |
| Elevated Zero-Maze Test                                                 | 7     | 2       | 10       | 3       |
| Elevated Plus Maze Test                                                 | 10    | -       | 9        | -       |
| Learned Helplessness Test                                               | 11    | 6       | 12       | 10      |
| HPLC measurements of the tissue content of serotonin and its metabolite | 8     | -       | 8        | -       |
| 8-OH-DPAT-induced hypothermia test (0.2 mg/kg, i.p.)                    | 4     | 4       | 5        | 3       |
| 8-OH-DPAT-induced hypothermia test (0.5 mg/kg, i.p.)                    | 4     | 3       | 3        | 3       |
| 8-OH-DPAT-induced hypothermia test (1 mg/kg, i.p.)                      | 3     | 3       | 4        | 4       |

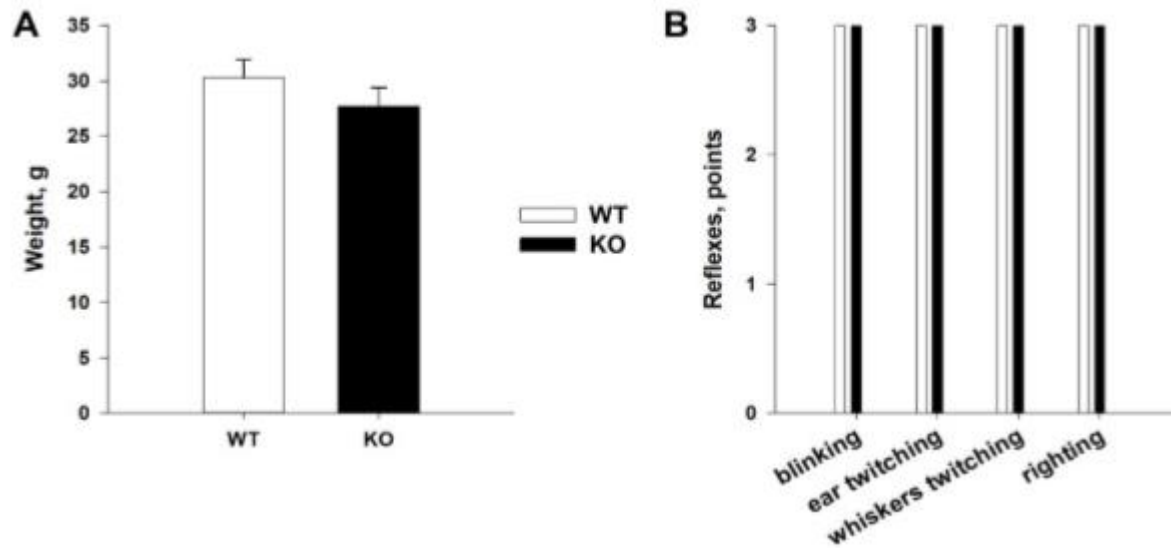

**Figure S1.** General behavioral profile of TAAR5-KO mice (both sexes). A. Weight of the animals (WT: n = 9; KO: n = 8). B. Sensory reflexes and motor abilities were evaluated in concordance with 3-point scale where 3 – norm; 2 – decreased state; 1 - absence. (WT: n = 13; KO: n = 10).
